# Supplementary material for: NMR Metabolomics and DNA Sequencing of Escherichia coli and Staphylococcus aureus Cultures Treated with Hydrolyzable Tannins
Source: MDPI journal article supplement (doi:10.3390/metabo13030320), 2023-02-21
Supplement: s1 [file s1]

Supplementary Materials

# NMR metabolomics and DNA sequencing of *Escherichia coli* and *Staphylococcus aureus* cultures treated with hydrolysable tannins

Valtteri Virtanen <sup>1,\*</sup>, Elina Puljula <sup>1</sup>, Gemma Walton <sup>2</sup>, Martin J. Woodward <sup>2,3</sup> and Maarit Karonen <sup>1</sup>

<sup>1</sup> Natural Chemistry Research Group, Department of Chemistry, University of Turku, FI-20014 Turku, Finland;

<sup>2</sup> Department of Food and Nutritional Studies, The University of Reading, Reading RG6 6AH, UK

<sup>3</sup> Folium Science, Science Creates, Midland Road, Old Market, Bristol, BS2 0JZ

\* Correspondence: vtjvir@utu.fi; Tel.: +358-29-450-3205

## Table of Contents

|                                                                                                                                                                                                                                                              |   |
|--------------------------------------------------------------------------------------------------------------------------------------------------------------------------------------------------------------------------------------------------------------|---|
| Figure S1. Statistically significant ( $P < .05$ ) identified metabolites and their concentrations from the <i>E. coli</i> sample set at 0 h, 5 h, and 24 h time points with hydrolysable tannin (HT) treatments and controls separated.....                 | 2 |
| Figure S2. Statistically significant ( $P < .05$ ) identified metabolites and their concentrations from the <i>S. aureus</i> sample set at 0 h, 5 h, and 24 h time points with hydrolysable tannin (HT) treatments and controls separated.....               | 3 |
| Figure S3. Statistically significant ( $P < .05$ ) identified metabolites (1–7, 9 and 11) and their concentrations from the fecal BC sample set at 0 h, 5 h, 24 h, and 48 h time points with hydrolysable tannin (HT) treatments and controls separated..... | 4 |
| Figure S4. Statistically significant ( $P < .05$ ) identified metabolites (12–15 and 17) and their concentrations from the fecal BC sample set at 0 h, 5 h, 24 h, and 48 h time points with hydrolysable tannin (HT) treatments and controls separated.....  | 5 |
| S1. Hydrolysable tannins utilized in the study with information on plant origin, purity measured by UPLC-DAD at 280 nm, ESI-MS identification and <sup>1</sup> H NMR assignation with labeled chemical structure.....                                        | 5 |

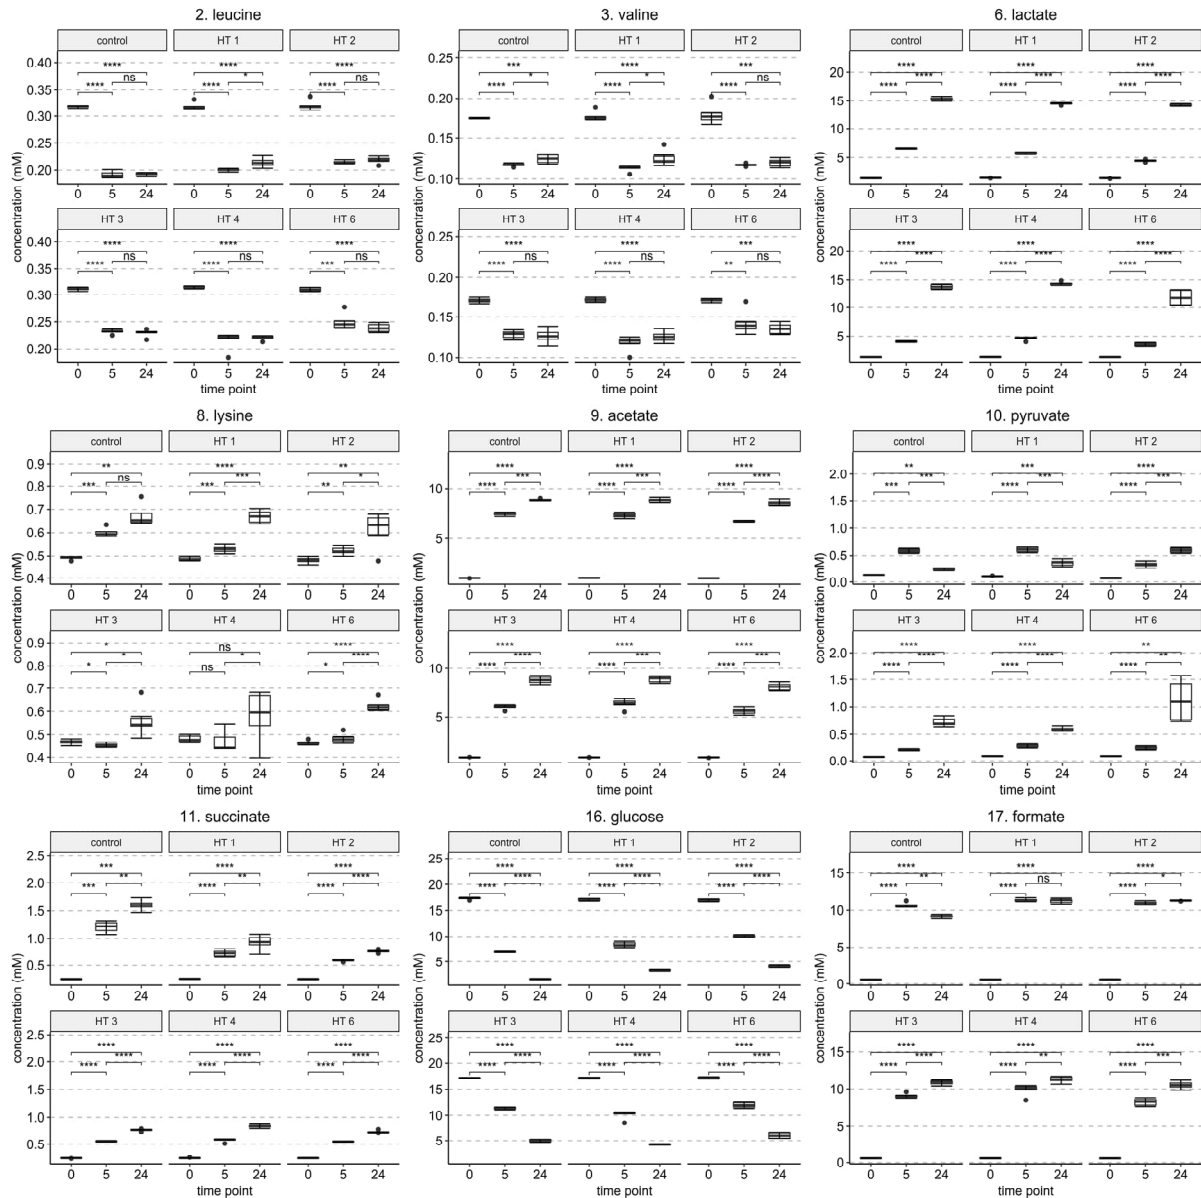

Figure S1. Statistically significant ( $P < .05$ ) identified metabolites and their concentrations from the *E. coli* sample set at 0 h, 5 h, and 24 h time points with hydrolysable tannin (HT) treatments and controls separated. HT 1, strictinin; HT 2, castalagin; HT 3, tellimagrandin II; HT 4, pentagalloylglucose; HT 6, rugosin D. Metabolites are numbered according to Table 1 in the article. The y-axis of the subplots of each metabolite is scaled according to the largest observed concentration of that metabolite. Levels of significance: \*\*\*\*  $P < .0001$ ; \*\*\*  $P < .001$ ; \*\*  $P < .01$ ; \*  $P < .05$ ; ns = non-significant.  $P$  values of difference are from a paired t-test ( $n=6$ ).

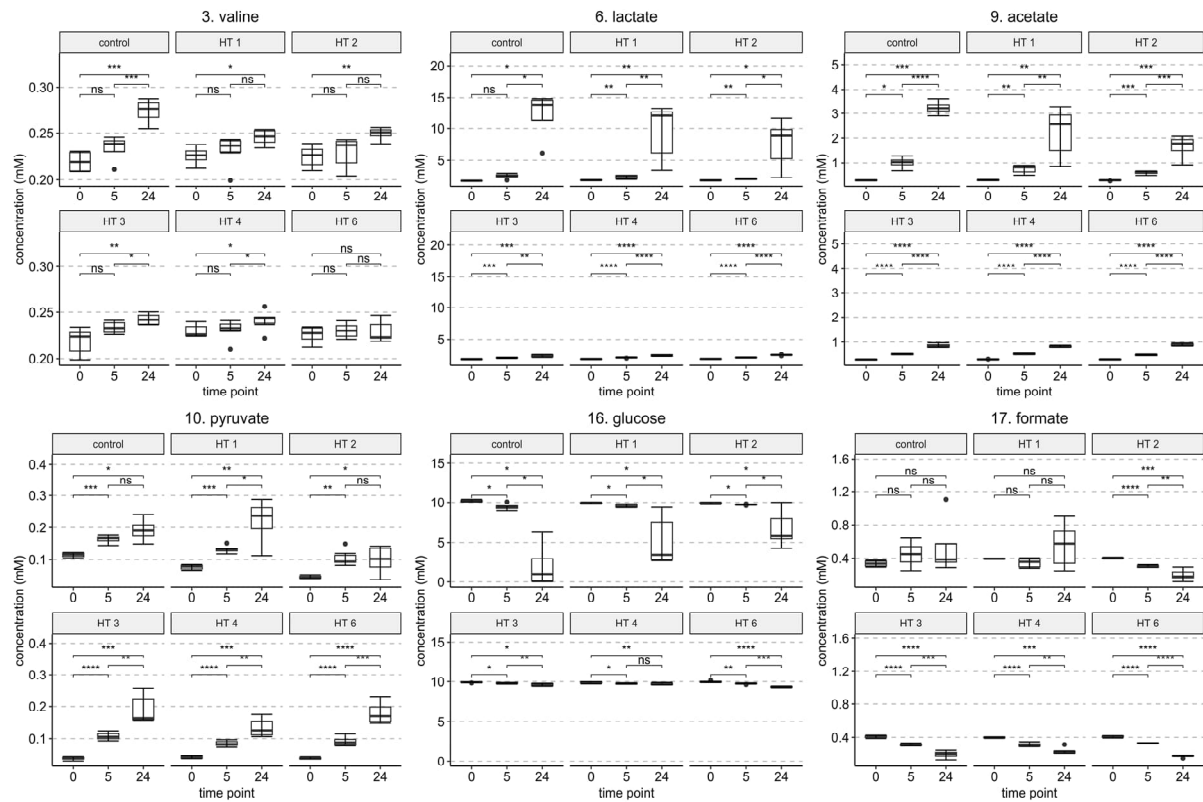

Figure S2. Statistically significant ( $P < .05$ ) identified metabolites and their concentrations from the *S. aureus* sample set at 0 h, 5 h, and 24 h time points with hydrolysable tannin (HT) treatments and controls separated. HT 1, strictinin; HT 2, castalagin; HT 3, tellimagrandin II; HT 4, pentagalloylglucose; HT 6, rugosin D. Metabolites are numbered according to Table 1 in the article. The y-axis of the subplots of each metabolite is scaled according to the largest observed concentration of that metabolite. Levels of significance: \*\*\*\*  $P < .0001$ ; \*\*\*  $P < .001$ ; \*\*  $P < .01$ ; \*  $P < .05$ ; ns=non-significant.  $P$  values of difference are from a paired t-test ( $n=6$ ).

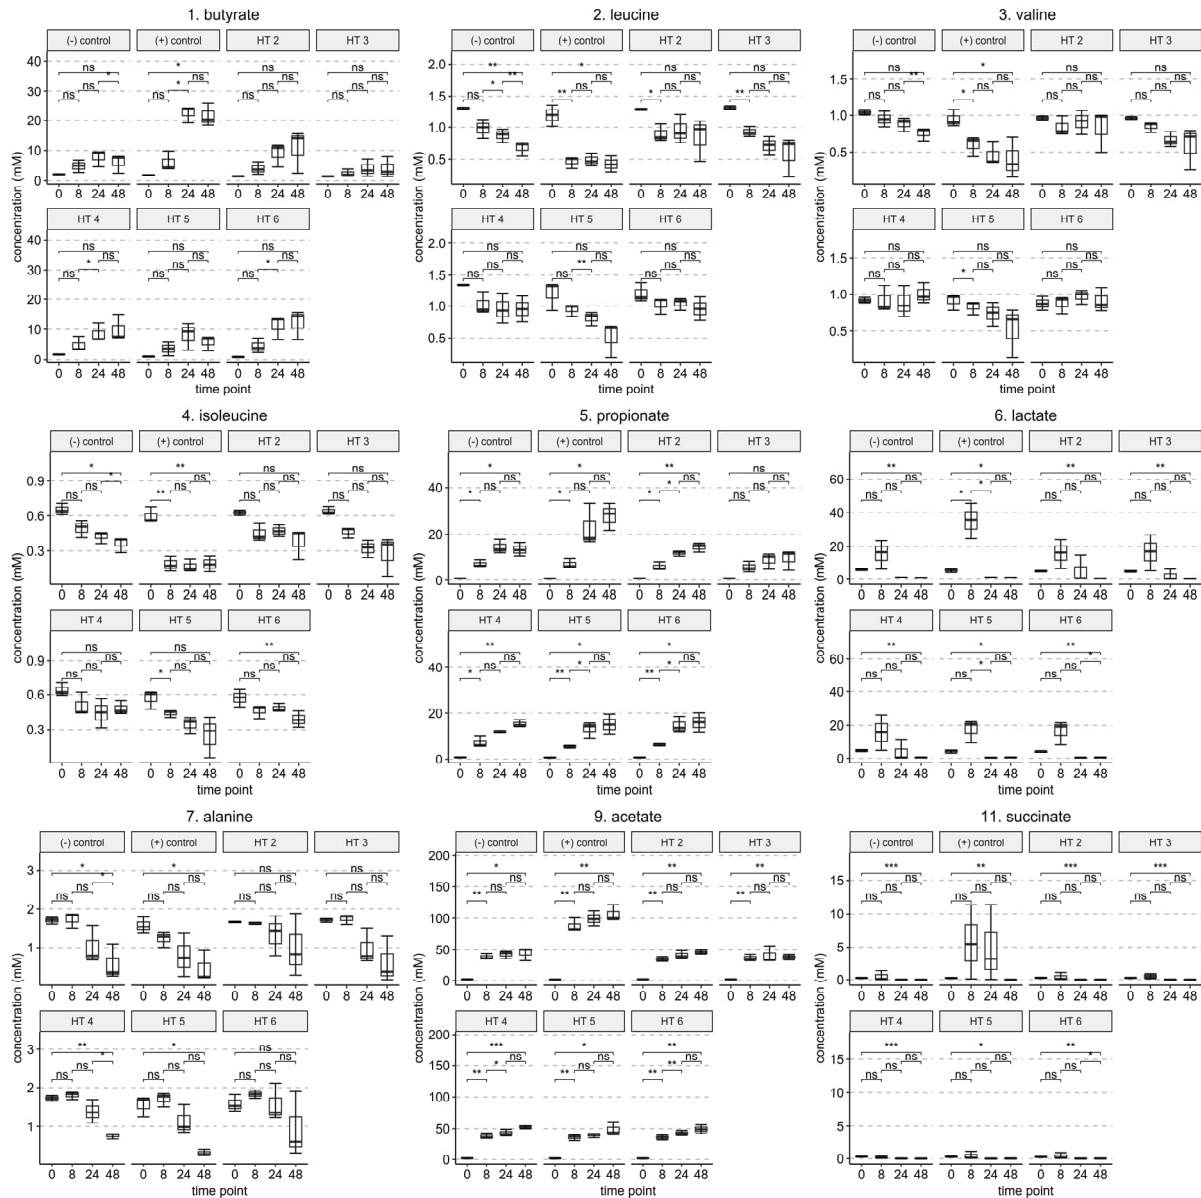

Figure S3. Statistically significant ( $P < .05$ ) identified metabolites (1–7, 9 and 11) and their concentrations from the fecal BC sample set at 0 h, 5 h, 24 h, and 48 h time points with hydrolysable tannin (HT) treatments and controls separated. HT 2, castalagin; HT 3, tellimagrandin II; HT 4, pentagalloylglucose; HT 5, salicarinin A; HT 6, rugosin D. Metabolites are numbered according to Table 1 in the article. The y-axis of the subplots of each metabolite is scaled according to the largest observed concentration of that metabolite. Levels of significance: \*\*\*\*  $P < .0001$ ; \*\*\*  $P < .001$ ; \*\*  $P < .01$ ; \*  $P < .05$ ; ns=non-significant.  $P$  values of difference are from a paired t-test ( $n=3$ ).

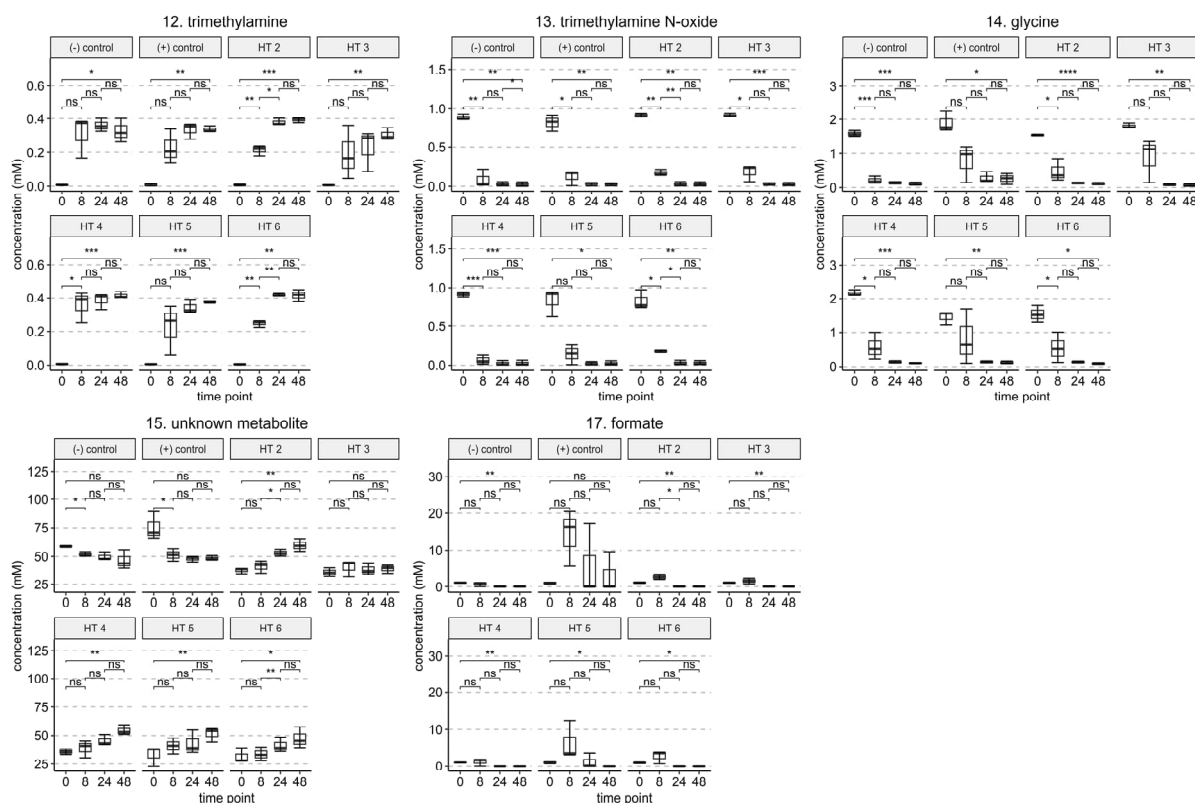

Figure S4. Statistically significant ( $P < 0.05$ ) identified metabolites (12–15 and 17) and their concentrations from the fecal BC sample set at 0 h, 5 h, 24 h, and 48 h time points with hydrolysable tannin (HT) treatments and controls separated. HT 2, castalagin; HT 3, tellimagrandin II; HT 4, pentagalloylglucose; HT 5, salicarinin A; HT 6, rugosin D. Metabolites are numbered according to Table 1 in the article. The y-axis of the subplots of each metabolite is scaled according to the largest observed concentration of that metabolite. Levels of significance: \*\*\*\*  $P < 0.0001$ ; \*\*\*  $P < 0.001$ ; \*\*  $P < 0.01$ ; \*  $P < 0.05$ ; ns=non-significant.  $P$  values of difference are from a paired t-test ( $n=3$ ).

S1. Hydrolysable tannins utilized in the study with information on plant origin, purity measured by UPLC-DAD at 280 nm, ESI-MS identification and  $^1\text{H}$  NMR assignment with labeled chemical structure.

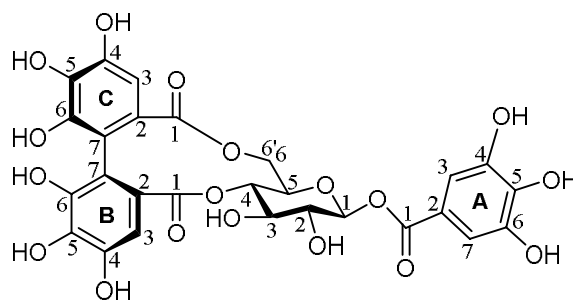

Strictinin (1) was isolated from *Hippophae rhamnoides* leaves; purity measured by UPLC-DAD at 280 nm 98.6 %; ESI-MS identification:  $m/z$  at 633.07290 ( $[\text{M}-\text{H}]^-$ , error  $-0.7$  ppm), 300.99884 ( $[\text{ellagic acid}-\text{H}]^-$ , error  $-0.1$  ppm);  $^1\text{H}$  NMR (500 MHz, acetone- $d_6$ , 298 K):  $\delta$  3.70 (t, 1H,  $J=8.5$  Hz,  $\text{H}_{\text{glc}}-2$ ),  $\delta$  3.78 (d, 1H,  $J=13.0$  Hz,  $\text{H}_{\text{glc}}-6'$ ),  $\delta$  3.83 (d, 1H,  $J=9.3$  Hz,  $\text{H}_{\text{glc}}-3$ ),  $\delta$  4.11 (dd, 1H,  $J=5.7, 9.9$  Hz,  $\text{H}_{\text{glc}}-5$ ),  $\delta$  4.90 (t, 1H,  $J=9.8$  Hz,  $\text{H}_{\text{glc}}-4$ ),  $\delta$  5.21 (dd, 1H,  $J=6.4, 13.3$  Hz,  $\text{H}_{\text{glc}}-6$ ),  $\delta$  5.74 (d, 1H,  $J=8.1$  Hz,  $\text{H}_{\text{glc}}-1$ ),  $\delta$  6.60 (s, 1H,  $\text{H}_C-3$ ),  $\delta$  6.71 (s, 1H,  $\text{H}_B-3$ ),  $\delta$  7.20 (s, 2H,  $\text{H}_A-3,7$ ).

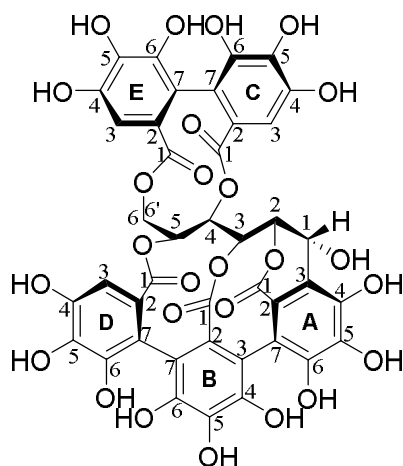

Castalagin (2) was isolated from *Quercus robur* acorns; purity measured by UPLC-DAD at 280 nm 99.6 %; ESI-MS identification:  $m/z$  at 933.06196 ( $[M-H]^-$ , error  $-2.1$  ppm), 631.05890 ( $[M\text{-hexahydroxydiphenyl-H}]^-$ , error 1.9 ppm), 300.99898 ( $[ellagic\ acid-H]^-$ , error  $-0.03$  ppm);  $^1H$  NMR (600 MHz, acetone- $d_6$ , 298 K):  $\delta$  4.01 (d, 1H,  $J=12.5$  Hz,  $H_{glc-6'}$ ),  $\delta$  5.03 (m, 1H,  $H_{glc-3}$ ),  $\delta$  5.04 (m, 1H,  $H_{glc-4}$ ),  $\delta$  5.10 (dd, 1H,  $J=2.6, 13.0$  Hz,  $H_{glc-6}$ ),  $\delta$  5.24 (t, 1H,  $J=7.3$  Hz,  $H_{glc-4}$ ),  $\delta$  5.61 (ddd, 1H,  $J=1.0, 2.5, 7.7$  Hz,  $H_{glc-5}$ ),  $\delta$  5.71 (d, 1H,  $J=4.4$  Hz,  $H_{glc-1}$ ),  $\delta$  6.63 (s, 1H,  $H_E-3$ ),  $\delta$  6.77 (s, 2H,  $H_C-3$  &  $H_D-3$ ).

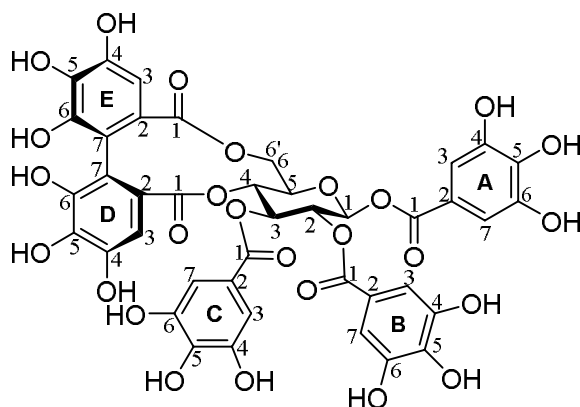

Tellimagrandin II (3) was isolated from *Filipendula ulmaria* flowers; purity measured by UPLC-DAD at 280 nm 90.2 %; ESI-MS identification:  $m/z$  at 937.09506 ( $[M-H]^-$ , error  $-0.2$  ppm), 767.07276 ( $[M\text{-galloyl-H}]^-$ , error  $-1.3$  ppm), 465.06793 ( $[M\text{-galloyl-hexahydroxydiphenyl-H}]^-$ , error 1.0 ppm), 300.99885 ( $[ellagic\ acid-H]^-$ , error  $-0.5$  ppm);  $^1H$  NMR (600 MHz, acetone- $d_6$ , 298 K):  $\delta$  3.89 (d, 1H,  $J=13.3$  Hz,  $H_{glc-6'}$ ),  $\delta$  4.55 (dd, 1H,  $J=6.4, 9.9$  Hz,  $H_{glc-5}$ ),  $\delta$  5.22 (t, 1H,  $J=10.0$  Hz,  $H_{glc-4}$ ),  $\delta$  5.37 (dd, 1H,  $J=6.6, 13.4$  Hz,  $H_{glc-6}$ ),  $\delta$  5.60 (dd, 1H,  $J=8.5, 9.4$  Hz,  $H_{glc-2}$ ),  $\delta$  5.85 (t, 1H,  $J=9.8$  Hz,  $H_{glc-3}$ ),  $\delta$  6.21 (d, 1H,  $J=8.3$  Hz,  $H_{glc-1}$ ),  $\delta$  6.47 (s, 1H,  $H_D-3$ ),  $\delta$  6.66 (s, 1H,  $H_E-3$ ),  $\delta$  6.98 (s, 2H,  $H_C-3,7$ ),  $\delta$  7.01 (s, 2H,  $H_B-3,7$ ),  $\delta$  7.12 (s, 2H,  $H_A-3,7$ ).

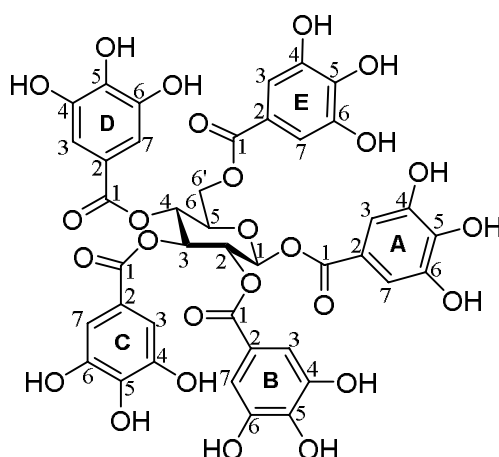

1,2,3,4,6-penta-*O*-galloyl- $\beta$ -D-glucose (4) was purified from tannic acid (J.T. Baker, Denventer, Holland); purity measured by UPLC-DAD at 280 nm 98.6 %; ESI-MS identification:  $m/z$  at 939.11042 ( $[M-H]^-$ , error -0.5 ppm), 769.08889 ( $[M-\text{galloyl}-H]^-$ , error -0.6), 617.07854 ( $[M-2\text{galloyls}-H]^-$ , error 0.2 ppm), 169.01516 ( $[\text{gallic acid}-H]^-$ , error 5.4 ppm), 125.02547 ( $[\text{gallic acid}-\text{COOH}-H]^-$ , 8.4 ppm);  $^1\text{H}$  NMR (600 MHz, acetone- $d_6$ , 298 K):  $\delta$  4.41 (dd, 1H,  $J=4.5, 12.5$  Hz,  $H_{\text{glc}}-6'$ ),  $\delta$  4.54 (m, 1H),  $H_{\text{glc}}-6$ ,  $\delta$  4.56 (ddd, 1H,  $J=1.6, 4.4, 9.9$  Hz,  $H_{\text{glc}}-5$ ),  $\delta$  5.61 (dd, 1H,  $J=8.3, 9.9$  Hz,  $H_{\text{glc}}-2$ ),  $\delta$  5.66 (t, 1H,  $J=9.7$  Hz,  $H_{\text{glc}}-4$ ),  $\delta$  6.01 (t, 1H,  $J=9.8$  Hz,  $H_{\text{glc}}-3$ ),  $\delta$  6.34 (d, 1H,  $J=8.3$  Hz,  $H_{\text{glc}}-1$ ),  $\delta$  6.97 (s, 2H,  $H_{\text{C}}-3,7$ ),  $\delta$  7.01 (s, 2H,  $H_{\text{B}}-3,7$ ),  $\delta$  7.06 (s, 2H,  $H_{\text{D}}-3,7$ ),  $\delta$  7.11 (s, 2H,  $H_{\text{A}}-3,7$ ),  $\delta$  7.18 (s, 2H,  $H_{\text{E}}-3,7$ ).

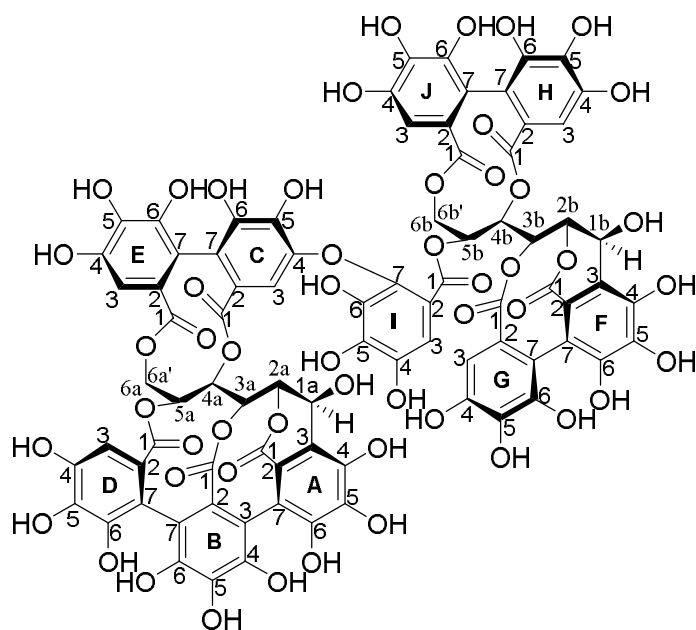

Salicarinin A (5) was isolated from *Lythrum salicaria* leaves; purity measured by UPLC-DAD at 280 nm 96.0 %; ESI-MS identification:  $m/z$  at 1867.13039 ( $[M-H]^-$ , error -2.6 ppm), 933.06290 ( $[M-2H]^{2-}$ , error -1.1 ppm), 924.05736 ( $[M-H_2O-2H]^{2-}$ , error -1.4 ppm), 915.50205 ( $[M-2H_2O-2H]^{2-}$ , error -1.4 ppm), 300.99885 ( $[\text{ellagic acid}-H]^-$ , error -0.4 ppm);  $^1\text{H}$  NMR (600 MHz, acetone- $d_6$ , 298 K):  $\delta$  3.89 (d, 1H,  $J=12.9$  Hz,  $H_{\text{glc}}-6b'$ ),  $\delta$  3.95 (d, 1H,  $J=12.5$  Hz,  $H_{\text{glc}}-6a'$ ),  $\delta$  4.64 (dd, 1H,  $J=1.1, 6.7$  Hz,  $H_{\text{glc}}-3a$ ),  $\delta$  4.83 (m, 2H,  $H_{\text{glc}}-1b$  &  $H_{\text{glc}}-2b$ ),  $\delta$  4.85 (dd, 1H,  $J=3.5, 13.4$  Hz,  $H_{\text{glc}}-6b$ ),  $\delta$  4.93 (t, 1H,  $J=2.0$  Hz,  $H_{\text{glc}}-3b$ ),  $\delta$  4.93 (d, 1H,  $J=2.0$  Hz,  $H_{\text{glc}}-1a$ ),  $\delta$  5.08 (dd, 1H,  $J=2.4, 13.1$  Hz,  $H_{\text{glc}}-6a$ ),  $\delta$  5.14 (br s, 1H,  $H_{\text{glc}}-2a$ ),  $\delta$  5.18 (t, 1H,  $J=6.8$  Hz,  $H_{\text{glc}}-4a$ ),  $\delta$  5.40 (dd, 1H,  $J=2.8, 8.6$  Hz,  $H_{\text{glc}}-5b$ ),  $\delta$  5.55 (dd, 1H,  $J=2.5, 8.6$  Hz,  $H_{\text{glc}}-4b$ ),  $\delta$  5.63 (br d, 1H,  $J=6.8$  Hz,  $H_{\text{glc}}-5a$ ),  $\delta$  6.54 (s, 1H,  $H_{\text{G}}-3$ ),  $\delta$  6.62 (s, 2H,  $H_{\text{E}}-3$  &  $H_{\text{I}}-3$ ),  $\delta$  6.78 (s, 1H,  $H_{\text{D}}-3$ ),  $\delta$  6.83 (s, 1H,  $H_{\text{C}}-3$ ),  $\delta$  6.86 (s, 1H,  $H_{\text{H}}-3$ ),  $\delta$  7.07 (s, 1H,  $H_{\text{J}}-3$ ).

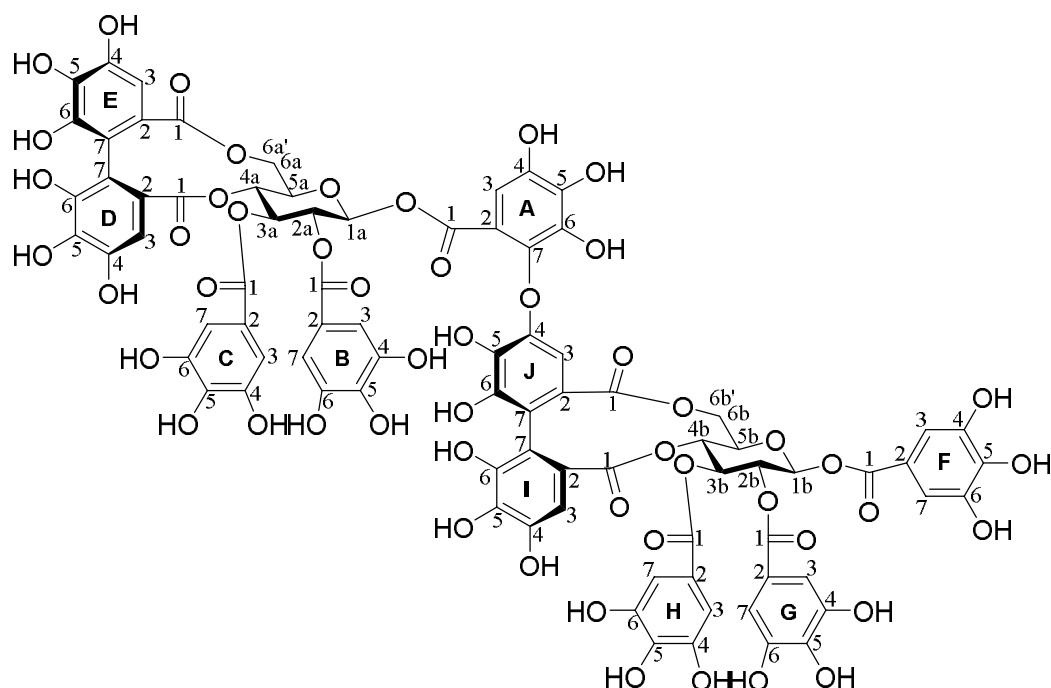

Rugosin D (6) was isolated from *Filipendula ulmaria* flowers; purity measured by UPLC-DAD at 280 nm 90.7 %; ESI-MS identification:  $m/z$  at 1873.17806 ( $[M-H]^-$ , error  $-2.1$  ppm), 936.08715 ( $[M-2H]^{2-}$ , error  $-0.3$  ppm), 300.99901 (ellagic acid- $H^-$ , error  $0.1$  ppm);  $^1H$  NMR (600 MHz, acetone- $d_6$ , 298 K):  $\delta$  3.79 (d, 1H,  $J=13.4$  Hz,  $H_{glc-6b'}$ ),  $\delta$  3.82 (d, 1H,  $J=13.5$  Hz,  $H_{glc-6a'}$ ),  $\delta$  4.48 (dd, 1H,  $J=7.2, 9.9$  Hz,  $H_{glc-5a}$ ),  $\delta$  4.52 (dd, 1H,  $J=6.3, 10.0$  Hz,  $H_{glc-5b}$ ),  $\delta$  5.166 (t, 1H,  $J=10.0$  Hz,  $H_{glc-4b}$ ),  $\delta$  5.167 (t, 1H,  $J=10.0$  Hz,  $H_{glc-4a}$ ),  $\delta$  5.31 (dd, 1H,  $J=6.5, 13.4$  Hz,  $H_{glc-6b}$ ),  $\delta$  5.32 (dd, 1H,  $J=6.6, 13.4$  Hz,  $H_{glc-6a}$ ),  $\delta$  5.54 (dd, 1H,  $J=8.3, 9.5$  Hz,  $H_{glc-2a}$ ),  $\delta$  5.61 (dd, 1H,  $J=8.4, 9.5$  Hz,  $H_{glc-2b}$ ),  $\delta$  5.79 (t, 1H,  $J=9.8$  Hz,  $H_{glc-3a}$ ),  $\delta$  5.84 (t, 1H,  $J=9.8$  Hz,  $H_{glc-3b}$ ),  $\delta$  6.13 (d, 1H,  $J=8.3$  Hz,  $H_{glc-1a}$ ),  $\delta$  6.19 (d, 1H,  $J=8.3$  Hz,  $H_{glc-1b}$ ),  $\delta$  6.24 (s, 1H,  $H_I-3$ ),  $\delta$  6.47 (s, 1H,  $H_I-3$ ),  $\delta$  6.49 (s, 1H,  $H_D-3$ ),  $\delta$  6.66 (s, 1H,  $H_E-3$ ),  $\delta$  6.98 (s, 2H,  $H_B-3$ ),  $\delta$  7.008 (s, 2H,  $H_G-3$ ),  $\delta$  7.012 (s, 2H,  $H_C-3$ ),  $\delta$  7.02 (s, 2H,  $H_H-3$ ),  $\delta$  7.134 (s, 2H,  $H_F-3$ ),  $\delta$  7.136 (s, 1H,  $H_A-3$ ).
